# Supplementary material for: Characterization of Klebsiella pneumoniae carrying the blaNDM-1 gene in IncX3 plasmids and the rare In1765 in an IncFIB-IncHI1B plasmid
Source: Frontiers journal article supplement (doi:10.3389/fcimb.2023.1324846), 2024-01-11
Supplement: Table_2.XLS [file Table_2.XLS]

## Sheet: F11_PlasmidBheatmap.blast_out
Table S4. Pairwise comparison of sequences for Plasmid pB_F11 from 143.212 kb-length to 154.876 kb-length and related plasmids using sequence BLASTN analysis
Coverage (%) + Identity (%)	CP028786.2	CP029118.1	CP029386.1	CP037965.1	CP039811.1	CP041938.1	CP043582.1	CP046274.1	CP046892.1	CP050158.1	CP053646.1	CP053694.1	CP055250.1	CP058664.1	CP060949.1	CP060952.1	CP076461.1	CP082900.1	CP084105.1	CP088226.1	CP088232.1	CP090129.1	CP091052.1	CP091483.1	CP092495.1	CP092903.1	CP092904.1	CP098373.1	CP103366.1	CP103970.1	CP114575.1	CP116218.1	CP119541.1	CP119547.1	CP119553.1	KP987216.1	KU314941.1	KY913899.1	LC570846.1	MF072961.1	MF415608.1	MG252893.1	MH909343.1	MH909346.1	MH909347.1	MH917282.1	MN061454.1	MN937240.1	MW269623.1
CP028786.2	100+100	93+100	100+100	100+100	100+100	100+100	100+100	100+100	100+100	100+100	100+100	100+100	100+100	100+100	92+100	92+100	100+100	100+100	100+100	100+100	99+100	100+100	100+100	100+100	100+100	100+100	100+100	100+100	100+100	100+100	100+100	100+100	93+100	93+100	93+100	95+100	100+100	100+100	100+100	100+100	100+100	100+100	100+100	100+100	100+100	100+100	100+100	100+100	100+100
CP029118.1	100+100	100+100	100+100	100+100	100+100	100+100	100+100	100+100	100+100	100+100	100+100	100+100	100+100	100+100	92+100	92+100	100+100	100+100	100+100	100+100	99+100	100+100	100+100	100+100	100+100	100+100	100+100	100+100	100+100	100+100	100+100	100+100	100+100	100+100	100+100	95+100	100+100	100+100	100+100	100+100	100+100	100+100	100+100	100+100	100+100	100+100	100+100	100+100	100+100
CP029386.1	100+100	93+100	100+100	100+100	100+100	100+100	100+100	100+100	100+100	100+100	100+100	100+100	100+100	100+100	92+100	92+100	100+100	100+100	100+100	100+100	99+100	100+100	100+100	100+100	100+100	100+100	100+100	100+100	100+100	100+100	100+100	100+100	93+100	93+100	93+100	95+100	100+100	100+100	100+100	100+100	100+100	100+100	100+100	100+100	100+100	100+100	100+100	100+100	100+100
CP037965.1	100+100	93+100	100+100	100+100	100+100	100+100	100+100	100+100	100+100	100+100	100+100	100+100	100+100	100+100	92+100	92+100	100+100	100+100	100+100	100+100	99+100	100+100	100+100	100+100	100+100	100+100	100+100	100+100	100+100	100+100	100+100	100+100	93+100	93+100	93+100	95+100	100+100	100+100	100+100	100+100	100+100	100+100	100+100	100+100	100+100	100+100	100+100	100+100	100+100
CP039811.1	100+100	93+100	100+100	100+100	100+100	100+100	100+100	100+100	100+100	100+100	100+100	100+100	100+100	100+100	92+100	92+100	100+100	100+100	100+100	100+100	99+100	100+100	100+100	100+100	100+100	100+100	100+100	100+100	100+100	100+100	100+100	100+100	93+100	93+100	93+100	95+100	100+100	100+100	100+100	100+100	100+100	100+100	100+100	100+100	100+100	100+100	100+100	100+100	100+100
CP041938.1	100+100	93+100	100+100	100+100	100+100	100+100	100+100	100+100	100+100	100+100	100+100	100+100	100+100	100+100	92+100	92+100	100+100	100+100	100+100	100+100	99+100	100+100	100+100	100+100	100+100	100+100	100+100	100+100	100+100	100+100	100+100	100+100	93+100	93+100	93+100	95+100	100+100	100+100	100+100	100+100	100+100	100+100	100+100	100+100	100+100	100+100	100+100	100+100	100+100
CP043582.1	100+100	93+100	100+100	100+100	100+100	100+100	100+100	100+100	100+100	100+100	100+100	100+100	100+100	100+100	92+100	92+100	100+100	100+100	100+100	100+100	99+100	100+100	100+100	100+100	100+100	100+100	100+100	100+100	100+100	100+100	100+100	100+100	93+100	93+100	93+100	95+100	100+100	100+100	100+100	100+100	100+100	100+100	100+100	100+100	100+100	100+100	100+100	100+100	100+100
CP046274.1	100+100	93+100	100+100	100+100	100+100	100+100	100+100	100+100	100+100	100+100	100+100	100+100	100+100	100+100	92+100	92+100	100+100	100+100	100+100	100+100	99+100	100+100	100+100	100+100	100+100	100+100	100+100	100+100	100+100	100+100	100+100	100+100	93+100	93+100	93+100	95+100	100+100	100+100	100+100	100+100	100+100	100+100	100+100	100+100	100+100	100+100	100+100	100+100	100+100
CP046892.1	100+100	93+100	100+100	100+100	100+100	100+100	100+100	100+100	100+100	100+100	100+100	100+100	100+100	100+100	92+100	92+100	100+100	100+100	100+100	100+100	99+100	100+100	100+100	100+100	100+100	100+100	100+100	100+100	100+100	100+100	100+100	100+100	93+100	93+100	93+100	95+100	100+100	100+100	100+100	100+100	100+100	100+100	100+100	100+100	100+100	100+100	100+100	100+100	100+100
CP050158.1	100+100	93+100	100+100	100+100	100+100	100+100	100+100	100+100	100+100	100+100	100+100	100+100	100+100	100+100	92+100	92+100	100+100	100+100	100+100	100+100	99+100	100+100	100+100	100+100	100+100	100+100	100+100	100+100	100+100	100+100	100+100	100+100	93+100	93+100	93+100	95+100	100+100	100+100	100+100	100+100	100+100	100+100	100+100	100+100	100+100	100+100	100+100	100+100	100+100
CP053646.1	100+100	93+100	100+100	100+100	100+100	100+100	100+100	100+100	100+100	100+100	100+100	100+100	100+100	100+100	92+100	92+100	100+100	100+100	100+100	100+100	99+100	100+100	100+100	100+100	100+100	100+100	100+100	100+100	100+100	100+100	100+100	100+100	93+100	93+100	93+100	95+100	100+100	100+100	100+100	100+100	100+100	100+100	100+100	100+100	100+100	100+100	100+100	100+100	100+100
CP053694.1	100+100	93+100	100+100	100+100	100+100	100+100	100+100	100+100	100+100	100+100	100+100	100+100	100+100	100+100	92+100	92+100	100+100	100+100	100+100	100+100	99+100	100+100	100+100	100+100	100+100	100+100	100+100	100+100	100+100	100+100	100+100	100+100	93+100	93+100	93+100	95+100	100+100	100+100	100+100	100+100	100+100	100+100	100+100	100+100	100+100	100+100	100+100	100+100	100+100
CP055250.1	100+100	93+100	100+100	100+100	100+100	100+100	100+100	100+100	100+100	100+100	100+100	100+100	100+100	100+100	92+100	92+100	100+100	100+100	100+100	100+100	99+100	100+100	100+100	100+100	100+100	100+100	100+100	100+100	100+100	100+100	100+100	100+100	93+100	93+100	93+100	95+100	100+100	100+100	100+100	100+100	100+100	100+100	100+100	100+100	100+100	100+100	100+100	100+100	100+100
CP058664.1	100+100	93+100	100+100	100+100	100+100	100+100	100+100	100+100	100+100	100+100	100+100	100+100	100+100	100+100	92+100	92+100	100+100	100+100	100+100	100+100	99+100	100+100	100+100	100+100	100+100	100+100	100+100	100+100	100+100	100+100	100+100	100+100	93+100	93+100	93+100	95+100	100+100	100+100	100+100	100+100	100+100	100+100	100+100	100+100	100+100	100+100	100+100	100+100	100+100
CP060949.1	98+100	93+100	98+100	98+100	98+100	98+100	98+100	98+100	98+100	98+100	98+100	98+100	98+100	98+100	92+100	100+100	98+100	98+100	98+100	98+100	98+100	98+100	98+100	98+100	98+100	98+100	98+100	98+100	98+100	98+100	98+100	98+100	93+100	93+100	93+100	94+100	98+100	98+100	98+100	98+100	98+100	98+100	98+100	98+100	98+100	98+100	98+100	98+100	98+100
CP060952.1	98+100	93+100	98+100	98+100	98+100	98+100	98+100	98+100	98+100	98+100	98+100	98+100	98+100	98+100	100+100	100+100	98+100	98+100	98+100	98+100	98+100	98+100	98+100	98+100	98+100	98+100	98+100	98+100	98+100	98+100	98+100	98+100	93+100	93+100	93+100	94+100	98+100	98+100	98+100	98+100	98+100	98+100	98+100	98+100	98+100	98+100	98+100	98+100	98+100
CP076461.1	100+100	93+100	100+100	100+100	100+100	100+100	100+100	100+100	100+100	100+100	100+100	100+100	100+100	100+100	92+100	92+100	100+100	100+100	100+100	100+100	99+100	100+100	100+100	100+100	100+100	100+100	100+100	100+100	100+100	100+100	100+100	100+100	93+100	93+100	93+100	95+100	100+100	100+100	100+100	100+100	100+100	100+100	100+100	100+100	100+100	100+100	100+100	100+100	100+100
CP082900.1	100+100	93+100	100+100	100+100	100+100	100+100	100+100	100+100	100+100	100+100	100+100	100+100	100+100	100+100	92+100	92+100	100+100	100+100	100+100	100+100	99+100	100+100	100+100	100+100	100+100	100+100	100+100	100+100	100+100	100+100	100+100	100+100	93+100	93+100	93+100	95+100	100+100	100+100	100+100	100+100	100+100	100+100	100+100	100+100	100+100	100+100	100+100	100+100	100+100
CP084105.1	100+100	93+100	100+100	100+100	100+100	100+100	100+100	100+100	100+100	100+100	100+100	100+100	100+100	100+100	92+100	92+100	100+100	100+100	100+100	100+100	99+100	100+100	100+100	100+100	100+100	100+100	100+100	100+100	100+100	100+100	100+100	100+100	93+100	93+100	93+100	95+100	100+100	100+100	100+100	100+100	100+100	100+100	100+100	100+100	100+100	100+100	100+100	100+100	100+100
CP088226.1	100+100	93+100	100+100	100+100	100+100	100+100	100+100	100+100	100+100	100+100	100+100	100+100	100+100	100+100	92+100	92+100	100+100	100+100	100+100	100+100	98+100	100+100	100+100	100+100	100+100	100+100	100+100	100+100	100+100	100+100	100+100	100+100	93+100	93+100	93+100	95+100	100+100	100+100	100+100	100+100	100+100	100+100	100+100	100+100	100+100	100+100	100+100	100+100	100+100
CP088232.1	100+100	93+100	100+100	100+100	100+100	100+100	100+100	100+100	100+100	100+100	100+100	100+100	100+100	100+100	92+100	92+100	100+100	100+100	100+100	100+100	100+100	100+100	100+100	100+100	100+100	100+100	100+100	100+100	100+100	100+100	100+100	100+100	93+100	93+100	93+100	96+100	100+100	100+100	100+100	100+100	100+100	100+100	100+100	100+100	100+100	100+100	100+100	100+100	100+100
CP090129.1	100+100	93+100	100+100	100+100	100+100	100+100	100+100	100+100	100+100	100+100	100+100	100+100	100+100	100+100	92+100	92+100	100+100	100+100	100+100	100+100	99+100	100+100	100+100	100+100	100+100	100+100	100+100	100+100	100+100	100+100	100+100	100+100	93+100	93+100	93+100	95+100	100+100	100+100	100+100	100+100	100+100	100+100	100+100	100+100	100+100	100+100	100+100	100+100	100+100
CP091052.1	100+100	93+100	100+100	100+100	100+100	100+100	100+100	100+100	100+100	100+100	100+100	100+100	100+100	100+100	92+100	92+100	100+100	100+100	100+100	100+100	99+100	100+100	100+100	100+100	100+100	100+100	100+100	100+100	100+100	100+100	100+100	100+100	93+100	93+100	93+100	95+100	100+100	100+100	100+100	100+100	100+100	100+100	100+100	100+100	100+100	100+100	100+100	100+100	100+100
CP091483.1	100+100	93+100	100+100	100+100	100+100	100+100	100+100	100+100	100+100	100+100	100+100	100+100	100+100	100+100	92+100	92+100	100+100	100+100	100+100	100+100	99+100	100+100	100+100	100+100	100+100	100+100	100+100	100+100	100+100	100+100	100+100	100+100	93+100	93+100	93+100	95+100	100+100	100+100	100+100	100+100	100+100	100+100	100+100	100+100	100+100	100+100	100+100	100+100	100+100
CP092495.1	100+100	93+100	100+100	100+100	100+100	100+100	100+100	100+100	100+100	100+100	100+100	100+100	100+100	100+100	92+100	92+100	100+100	100+100	100+100	100+100	99+100	100+100	100+100	100+100	100+100	100+100	100+100	100+100	100+100	100+100	100+100	100+100	93+100	93+100	93+100	95+100	100+100	100+100	100+100	100+100	100+100	100+100	100+100	100+100	100+100	100+100	100+100	100+100	100+100
CP092903.1	93+100	93+100	93+100	93+100	93+100	93+100	93+100	93+100	93+100	93+100	93+100	93+100	93+100	93+100	85+100	92+100	93+100	93+100	93+100	93+100	93+100	93+100	93+100	93+100	93+100	93+100	93+100	93+100	93+100	93+100	93+100	93+100	93+100	93+100	93+100	89+100	93+100	93+100	93+100	93+100	93+100	93+100	93+100	93+100	93+100	93+100	93+100	93+100	93+100
CP092904.1	100+100	93+100	100+100	100+100	100+100	100+100	100+100	100+100	100+100	100+100	100+100	100+100	100+100	100+100	92+100	92+100	100+100	100+100	100+100	100+100	99+100	100+100	100+100	100+100	100+100	100+100	100+100	100+100	100+100	100+100	100+100	100+100	93+100	93+100	93+100	95+100	100+100	100+100	100+100	100+100	100+100	100+100	100+100	100+100	100+100	100+100	100+100	100+100	100+100
CP098373.1	100+100	93+100	100+100	100+100	100+100	100+100	100+100	100+100	100+100	100+100	100+100	100+100	100+100	100+100	92+100	92+100	100+100	100+100	100+100	100+100	99+100	100+100	100+100	100+100	100+100	100+100	100+100	100+100	100+100	100+100	100+100	100+100	93+100	93+100	93+100	95+100	100+100	100+100	100+100	100+100	100+100	100+100	100+100	100+100	100+100	100+100	100+100	100+100	100+100
CP103366.1	100+100	93+100	100+100	100+100	100+100	100+100	100+100	100+100	100+100	100+100	100+100	100+100	100+100	100+100	92+100	92+100	100+100	100+100	100+100	100+100	99+100	100+100	100+100	100+100	100+100	100+100	100+100	100+100	100+100	100+100	100+100	100+100	93+100	93+100	93+100	95+100	100+100	100+100	100+100	100+100	100+100	100+100	100+100	100+100	100+100	100+100	100+100	100+100	100+100
CP103970.1	100+100	93+100	100+100	100+100	100+100	100+100	100+100	100+100	100+100	100+100	100+100	100+100	100+100	100+100	92+100	92+100	100+100	100+100	100+100	100+100	99+100	100+100	100+100	100+100	100+100	100+100	100+100	100+100	100+100	100+100	100+100	100+100	93+100	93+100	93+100	95+100	100+100	100+100	100+100	100+100	100+100	100+100	100+100	100+100	100+100	100+100	100+100	100+100	100+100
CP114575.1	100+100	93+100	100+100	100+100	100+100	100+100	100+100	100+100	100+100	100+100	100+100	100+100	100+100	100+100	92+100	92+100	100+100	100+100	100+100	100+100	99+100	100+100	100+100	100+100	100+100	100+100	100+100	100+100	100+100	100+100	100+100	100+100	93+100	93+100	93+100	95+100	100+100	100+100	100+100	100+100	100+100	100+100	100+100	100+100	100+100	100+100	100+100	100+100	100+100
CP116218.1	100+100	93+100	100+100	100+100	100+100	100+100	100+100	100+100	100+100	100+100	100+100	100+100	100+100	100+100	92+100	92+100	100+100	100+100	100+100	100+100	99+100	100+100	100+100	100+100	100+100	100+100	100+100	100+100	100+100	100+100	100+100	100+100	93+100	93+100	93+100	95+100	100+100	100+100	100+100	100+100	100+100	100+100	100+100	100+100	100+100	100+100	100+100	100+100	100+100
CP119541.1	100+100	100+100	100+100	100+100	100+100	100+100	100+100	100+100	100+100	100+100	100+100	100+100	100+100	100+100	92+100	92+100	100+100	100+100	100+100	100+100	99+100	100+100	100+100	100+100	100+100	100+100	100+100	100+100	100+100	100+100	100+100	100+100	100+100	100+100	100+100	95+100	100+100	100+100	100+100	100+100	100+100	100+100	100+100	100+100	100+100	100+100	100+100	100+100	100+100
CP119547.1	100+100	100+100	100+100	100+100	100+100	100+100	100+100	100+100	100+100	100+100	100+100	100+100	100+100	100+100	92+100	92+100	100+100	100+100	100+100	100+100	99+100	100+100	100+100	100+100	100+100	100+100	100+100	100+100	100+100	100+100	100+100	100+100	100+100	100+100	100+100	95+100	100+100	100+100	100+100	100+100	100+100	100+100	100+100	100+100	100+100	100+100	100+100	100+100	100+100
CP119553.1	100+100	100+100	100+100	100+100	100+100	100+100	100+100	100+100	100+100	100+100	100+100	100+100	100+100	100+100	92+100	92+100	100+100	100+100	100+100	100+100	99+100	100+100	100+100	100+100	100+100	100+100	100+100	100+100	100+100	100+100	100+100	100+100	100+100	100+100	100+100	95+100	100+100	100+100	100+100	100+100	100+100	100+100	100+100	100+100	100+100	100+100	100+100	100+100	100+100
KP987216.1	100+100	93+100	100+100	100+100	100+100	100+100	100+100	100+100	100+100	100+100	100+100	100+100	100+100	100+100	92+100	92+100	100+100	100+100	100+100	100+100	100+100	100+100	100+100	100+100	100+100	100+100	100+100	100+100	100+100	100+100	100+100	100+100	93+100	93+100	93+100	100+100	100+100	100+100	100+100	100+100	100+100	100+100	100+100	100+100	100+100	100+100	100+100	100+100	100+100
KU314941.1	100+100	93+100	100+100	100+100	100+100	100+100	100+100	100+100	100+100	100+100	100+100	100+100	100+100	100+100	92+100	92+100	100+100	100+100	100+100	100+100	99+100	100+100	100+100	100+100	100+100	100+100	100+100	100+100	100+100	100+100	100+100	100+100	93+100	93+100	93+100	95+100	100+100	100+100	100+100	100+100	100+100	100+100	100+100	100+100	100+100	100+100	100+100	100+100	100+100
KY913899.1	100+100	93+100	100+100	100+100	100+100	100+100	100+100	100+100	100+100	100+100	100+100	100+100	100+100	100+100	92+100	92+100	100+100	100+100	100+100	100+100	99+100	100+100	100+100	100+100	100+100	100+100	100+100	100+100	100+100	100+100	100+100	100+100	93+100	93+100	93+100	95+100	100+100	100+100	100+100	100+100	100+100	100+100	100+100	100+100	100+100	100+100	100+100	100+100	100+100
LC570846.1	100+100	93+100	100+100	100+100	100+100	100+100	100+100	100+100	100+100	100+100	100+100	100+100	100+100	100+100	92+100	92+100	100+100	100+100	100+100	100+100	99+100	100+100	100+100	100+100	100+100	100+100	100+100	100+100	100+100	100+100	100+100	100+100	93+100	93+100	93+100	95+100	100+100	100+100	100+100	100+100	100+100	100+100	100+100	100+100	100+100	100+100	100+100	100+100	100+100
MF072961.1	100+100	93+100	100+100	100+100	100+100	100+100	100+100	100+100	100+100	100+100	100+100	100+100	100+100	100+100	92+100	92+100	100+100	100+100	100+100	100+100	99+100	100+100	100+100	100+100	100+100	100+100	100+100	100+100	100+100	100+100	100+100	100+100	93+100	93+100	93+100	95+100	100+100	100+100	100+100	100+100	100+100	100+100	100+100	100+100	100+100	100+100	100+100	100+100	100+100
MF415608.1	100+100	93+100	100+100	100+100	100+100	100+100	100+100	100+100	100+100	100+100	100+100	100+100	100+100	100+100	92+100	92+100	100+100	100+100	100+100	100+100	99+100	100+100	100+100	100+100	100+100	100+100	100+100	100+100	100+100	100+100	100+100	100+100	93+100	93+100	93+100	95+100	100+100	100+100	100+100	100+100	100+100	100+100	100+100	100+100	100+100	100+100	100+100	100+100	100+100
MG252893.1	100+100	93+100	100+100	100+100	100+100	100+100	100+100	100+100	100+100	100+100	100+100	100+100	100+100	100+100	92+100	92+100	100+100	100+100	100+100	100+100	99+100	100+100	100+100	100+100	100+100	100+100	100+100	100+100	100+100	100+100	100+100	100+100	93+100	93+100	93+100	95+100	100+100	100+100	100+100	100+100	100+100	100+100	100+100	100+100	100+100	100+100	100+100	100+100	100+100
MH909343.1	100+100	93+100	100+100	100+100	100+100	100+100	100+100	100+100	100+100	100+100	100+100	100+100	100+100	100+100	92+100	92+100	100+100	100+100	100+100	100+100	99+100	100+100	100+100	100+100	100+100	100+100	100+100	100+100	100+100	100+100	100+100	100+100	93+100	93+100	93+100	95+100	100+100	100+100	100+100	100+100	100+100	100+100	100+100	100+100	100+100	100+100	100+100	100+100	100+100
MH909346.1	100+100	93+100	100+100	100+100	100+100	100+100	100+100	100+100	100+100	100+100	100+100	100+100	100+100	100+100	92+100	92+100	100+100	100+100	100+100	100+100	99+100	100+100	100+100	100+100	100+100	100+100	100+100	100+100	100+100	100+100	100+100	100+100	93+100	93+100	93+100	95+100	100+100	100+100	100+100	100+100	100+100	100+100	100+100	100+100	100+100	100+100	100+100	100+100	100+100
MH909347.1	100+100	93+100	100+100	100+100	100+100	100+100	100+100	100+100	100+100	100+100	100+100	100+100	100+100	100+100	92+100	92+100	100+100	100+100	100+100	100+100	99+100	100+100	100+100	100+100	100+100	100+100	100+100	100+100	100+100	100+100	100+100	100+100	93+100	93+100	93+100	95+100	100+100	100+100	100+100	100+100	100+100	100+100	100+100	100+100	100+100	100+100	100+100	100+100	100+100
MH917282.1	100+100	93+100	100+100	100+100	100+100	100+100	100+100	100+100	100+100	100+100	100+100	100+100	100+100	100+100	92+100	92+100	100+100	100+100	100+100	100+100	99+100	100+100	100+100	100+100	100+100	100+100	100+100	100+100	100+100	100+100	100+100	100+100	93+100	93+100	93+100	95+100	100+100	100+100	100+100	100+100	100+100	100+100	100+100	100+100	100+100	100+100	100+100	100+100	100+100
MN061454.1	100+100	93+100	100+100	100+100	100+100	100+100	100+100	100+100	100+100	100+100	100+100	100+100	100+100	100+100	92+100	92+100	100+100	100+100	100+100	100+100	99+100	100+100	100+100	100+100	100+100	100+100	100+100	100+100	100+100	100+100	100+100	100+100	93+100	93+100	93+100	95+100	100+100	100+100	100+100	100+100	100+100	100+100	100+100	100+100	100+100	100+100	100+100	100+100	100+100
MN937240.1	100+100	93+100	100+100	100+100	100+100	100+100	100+100	100+100	100+100	100+100	100+100	100+100	100+100	100+100	92+100	92+100	100+100	100+100	100+100	100+100	99+100	100+100	100+100	100+100	100+100	100+100	100+100	100+100	100+100	100+100	100+100	100+100	93+100	93+100	93+100	95+100	100+100	100+100	100+100	100+100	100+100	100+100	100+100	100+100	100+100	100+100	100+100	100+100	100+100
MW269623.1	100+100	93+100	100+100	100+100	100+100	100+100	100+100	100+100	100+100	100+100	100+100	100+100	100+100	100+100	92+100	92+100	100+100	100+100	100+100	100+100	99+100	100+100	100+100	100+100	100+100	100+100	100+100	100+100	100+100	100+100	100+100	100+100	93+100	93+100	93+100	95+100	100+100	100+100	100+100	100+100	100+100	100+100	100+100	100+100	100+100	100+100	100+100	100+100	100+100
MZ156801.1	100+100	93+100	100+100	100+100	100+100	100+100	100+100	100+100	100+100	100+100	100+100	100+100	100+100	100+100	92+100	92+100	100+100	100+100	100+100	100+100	99+100	100+100	100+100	100+100	100+100	100+100	100+100	100+100	100+100	100+100	100+100	100+100	93+100	93+100	93+100	95+100	100+100	100+100	100+100	100+100	100+100	100+100	100+100	100+100	100+100	100+100	100+100	100+100	100+100
OL964514.1	100+100	93+100	100+100	100+100	100+100	100+100	100+100	100+100	100+100	100+100	100+100	100+100	100+100	100+100	92+100	92+100	100+100	100+100	100+100	100+100	99+100	100+100	100+100	100+100	100+100	100+100	100+100	100+100	100+100	100+100	100+100	100+100	93+100	93+100	93+100	95+100	100+100	100+100	100+100	100+100	100+100	100+100	100+100	100+100	100+100	100+100	100+100	100+100	100+100
[truncated: 2 more columns]
